# Supplementary material for: Microevolutionary mechanism of high‐altitude adaptation in Tibetan chicken populations from an elevation gradient
Source: PubMed Central journal article supplement (PMC9753841; doi:10.1111/eva.13503), 2022-10-31

Supplementary Figure for

# Microevolutionary mechanism of high-altitude adaptation in Tibetan chicken populations from an elevation gradient

**Figure S1. Number of SNPs within a 20-k window across the chicken genome.**

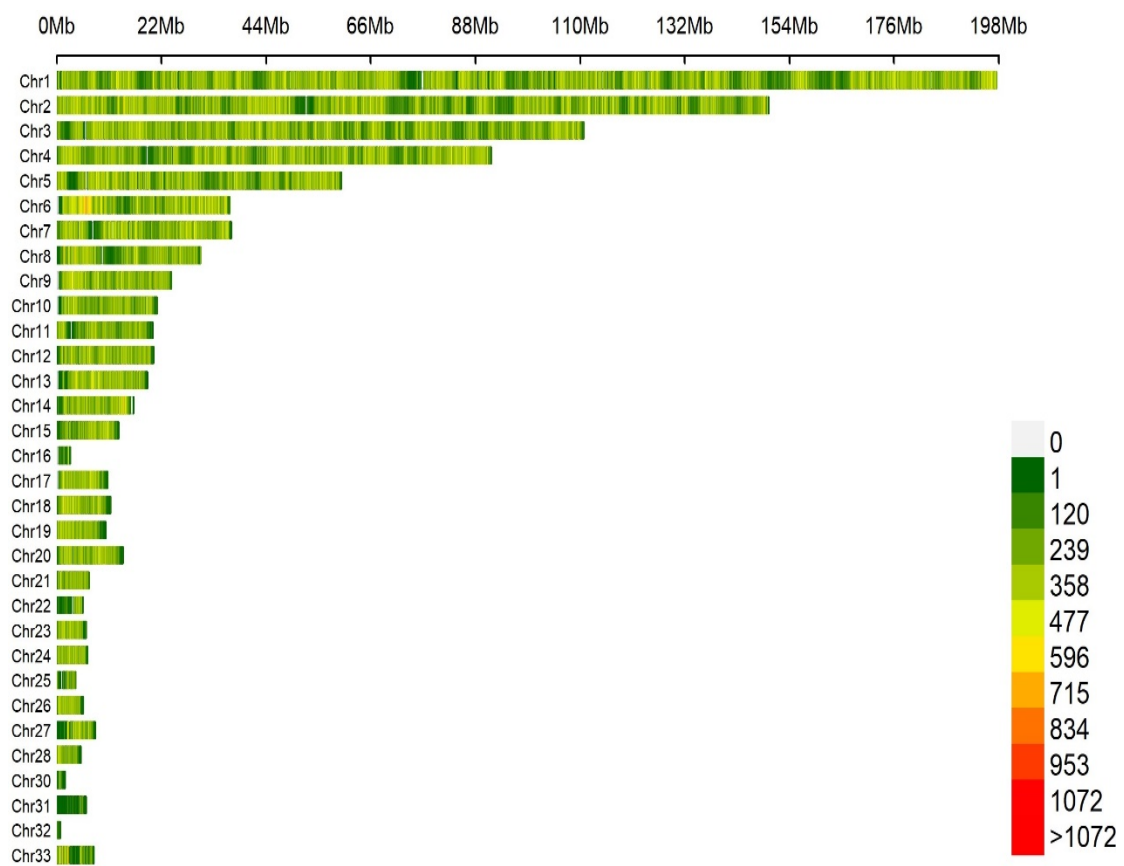

**Figure S2. Decay of linkage disequilibrium (LD) in the chicken genome for each breed and population.**

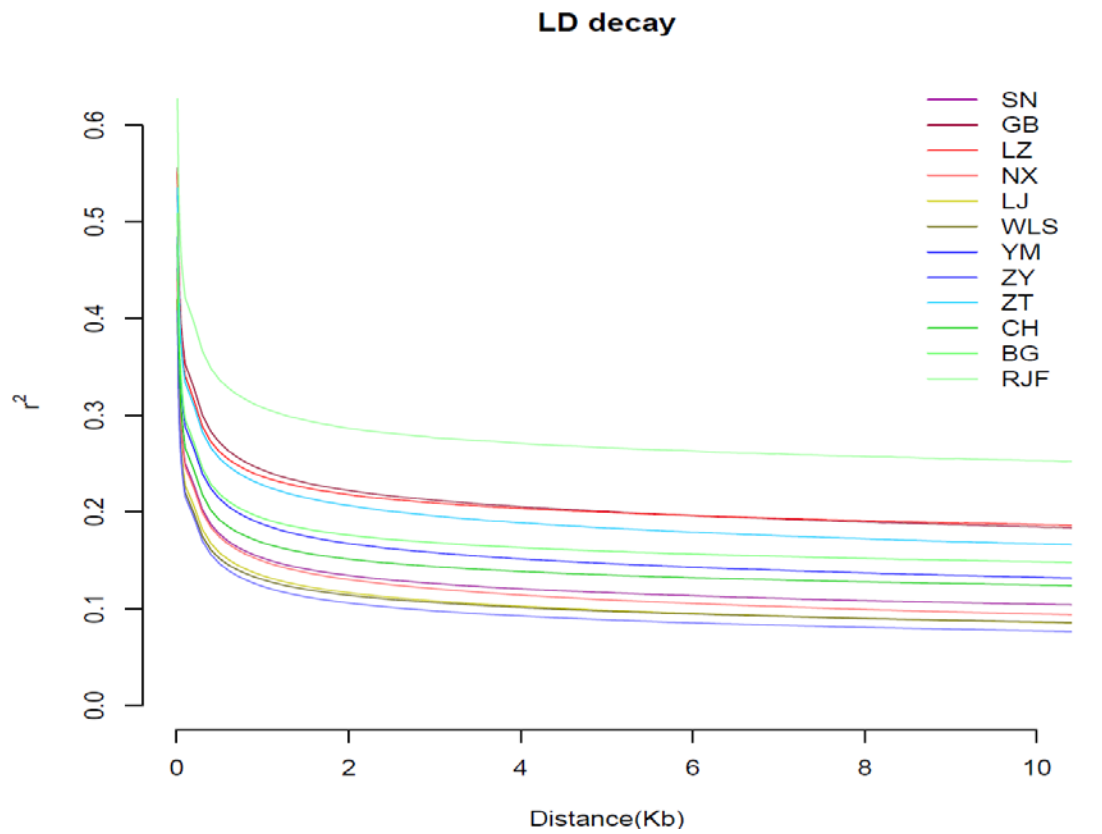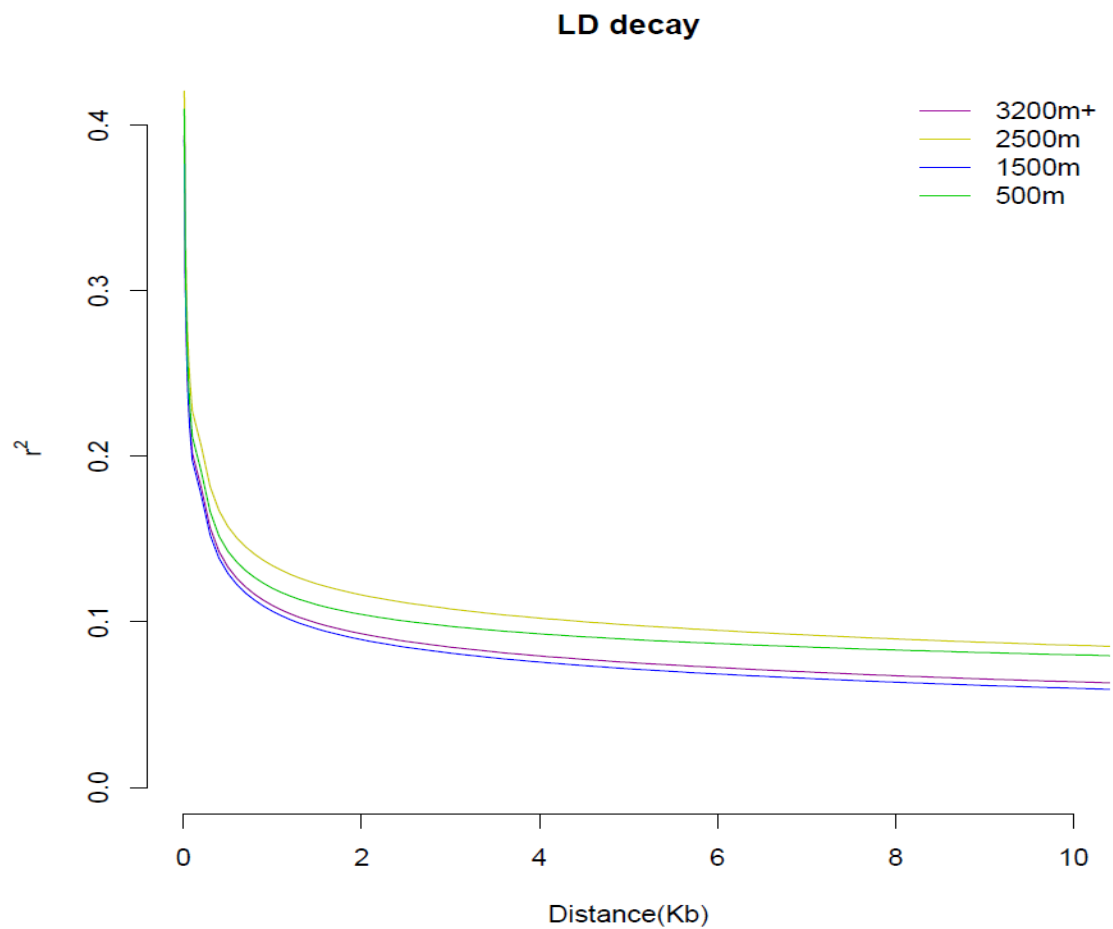

**Figure S3. Breed and population average pairwise nucleotide diversity ( $\theta_{\pi}$ ) in the genomes of Chinese native chickens.**

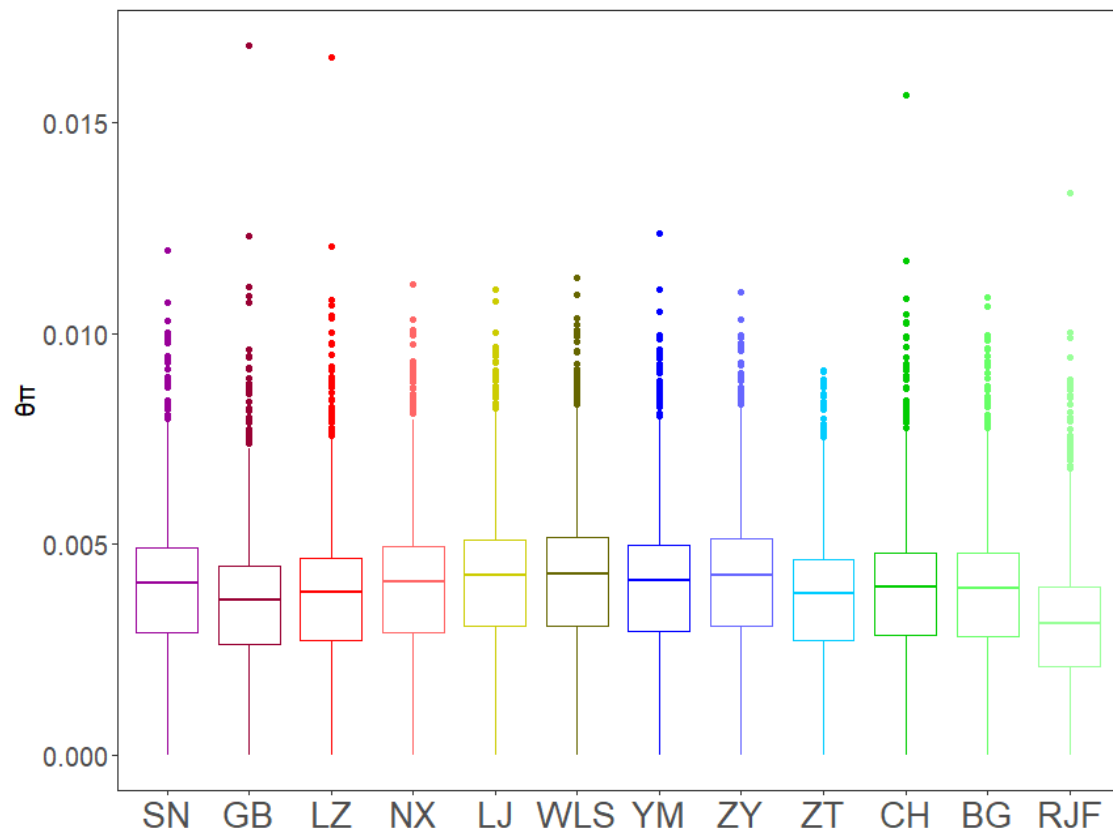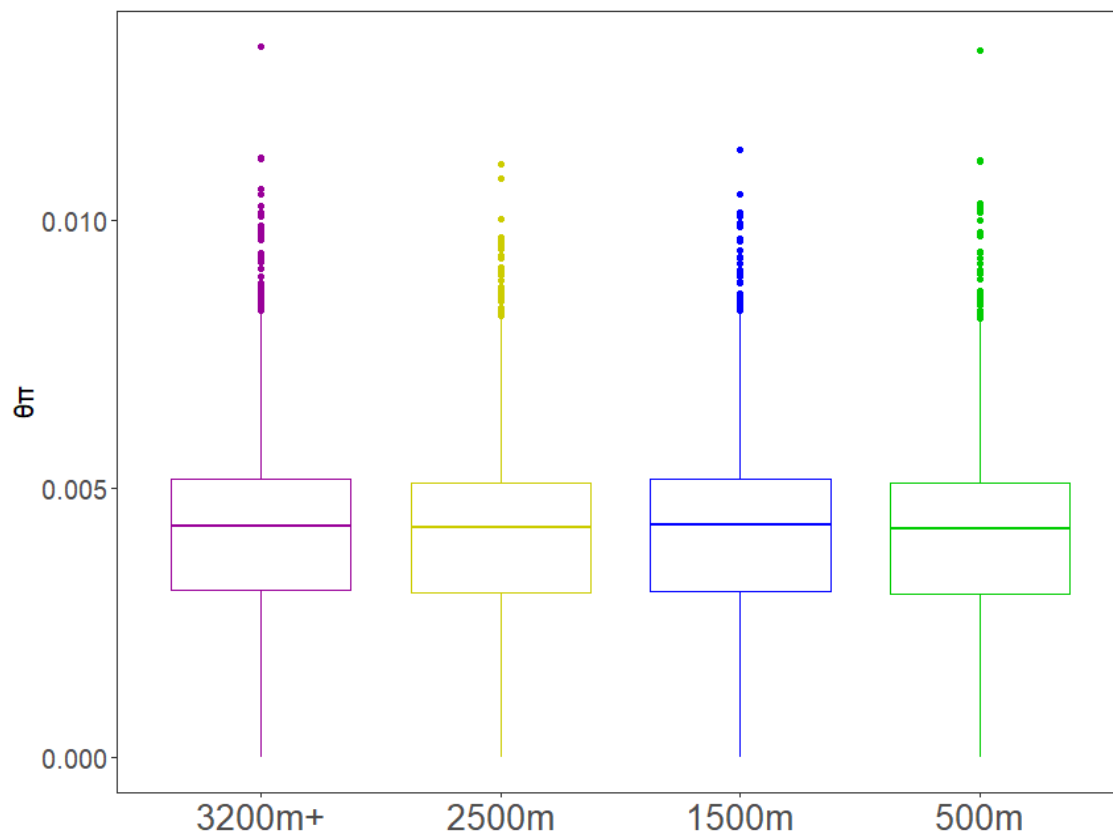

**Figure S4. Average regions of homozygosity (ROH) size in the genomes of each Chinese native chicken breed and population.**

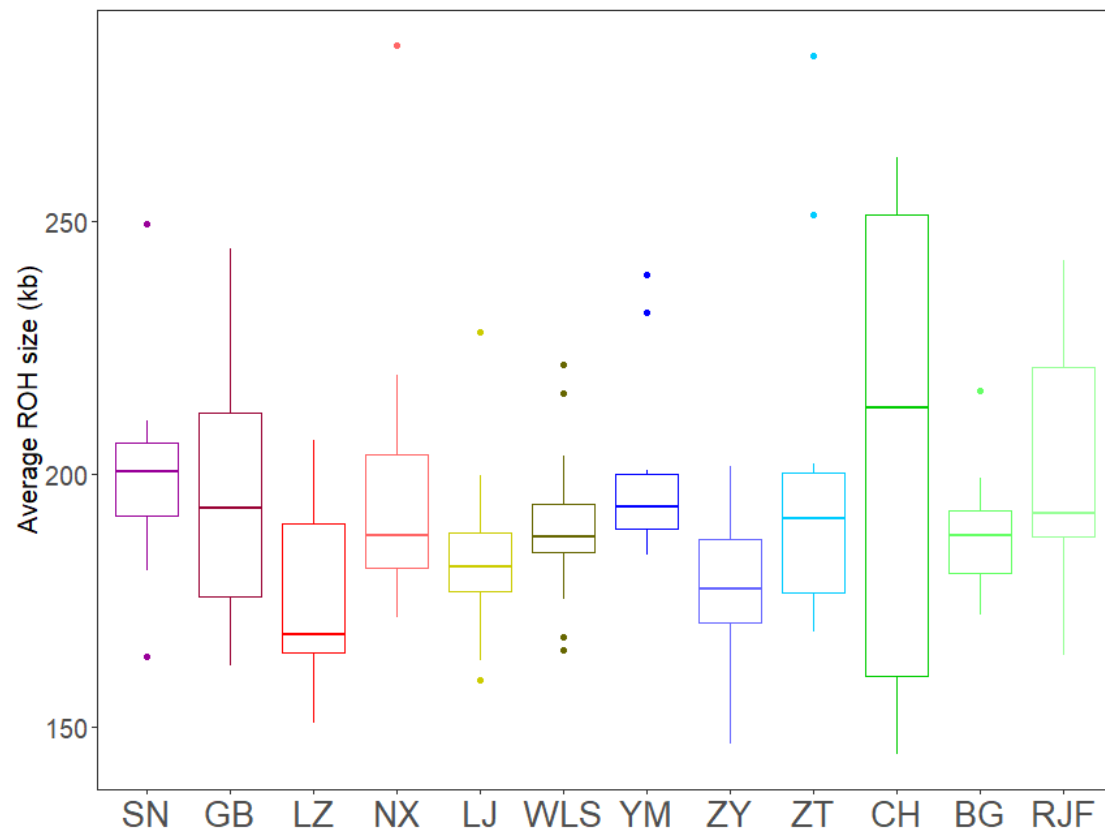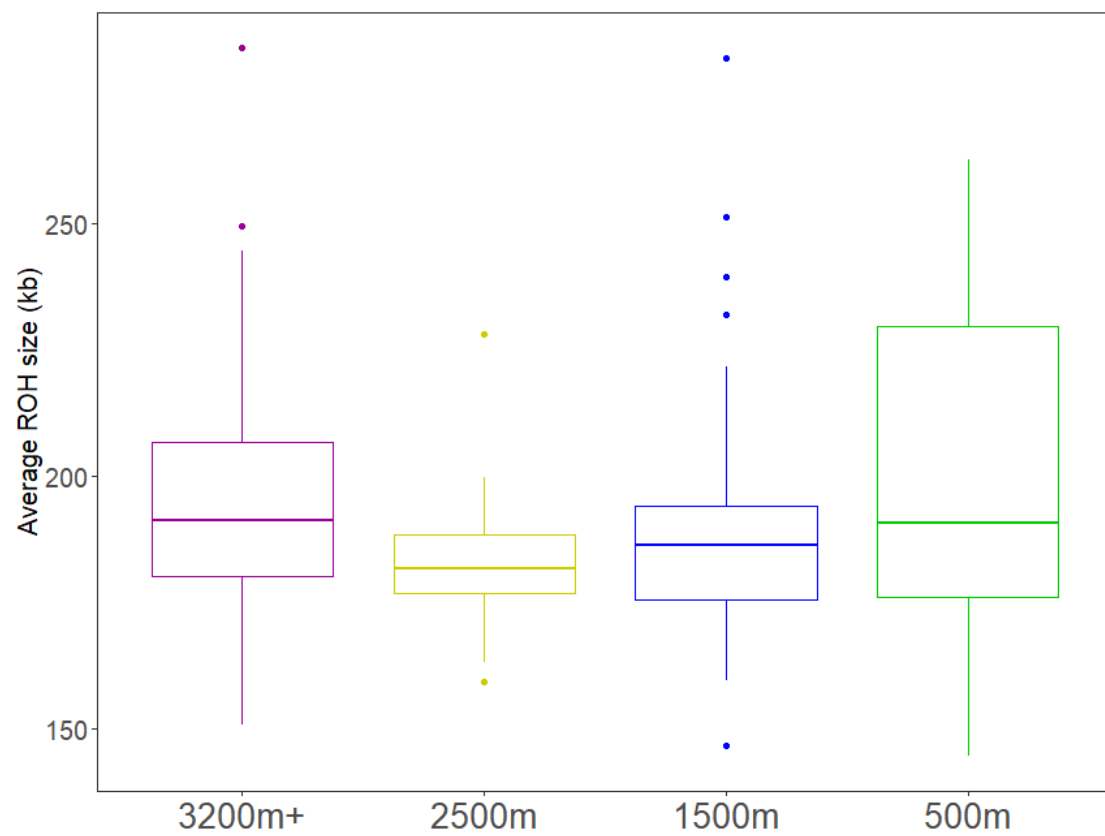

**Figure S5. Principle component analysis (PCA) results for the first and third components of 188 chickens.**

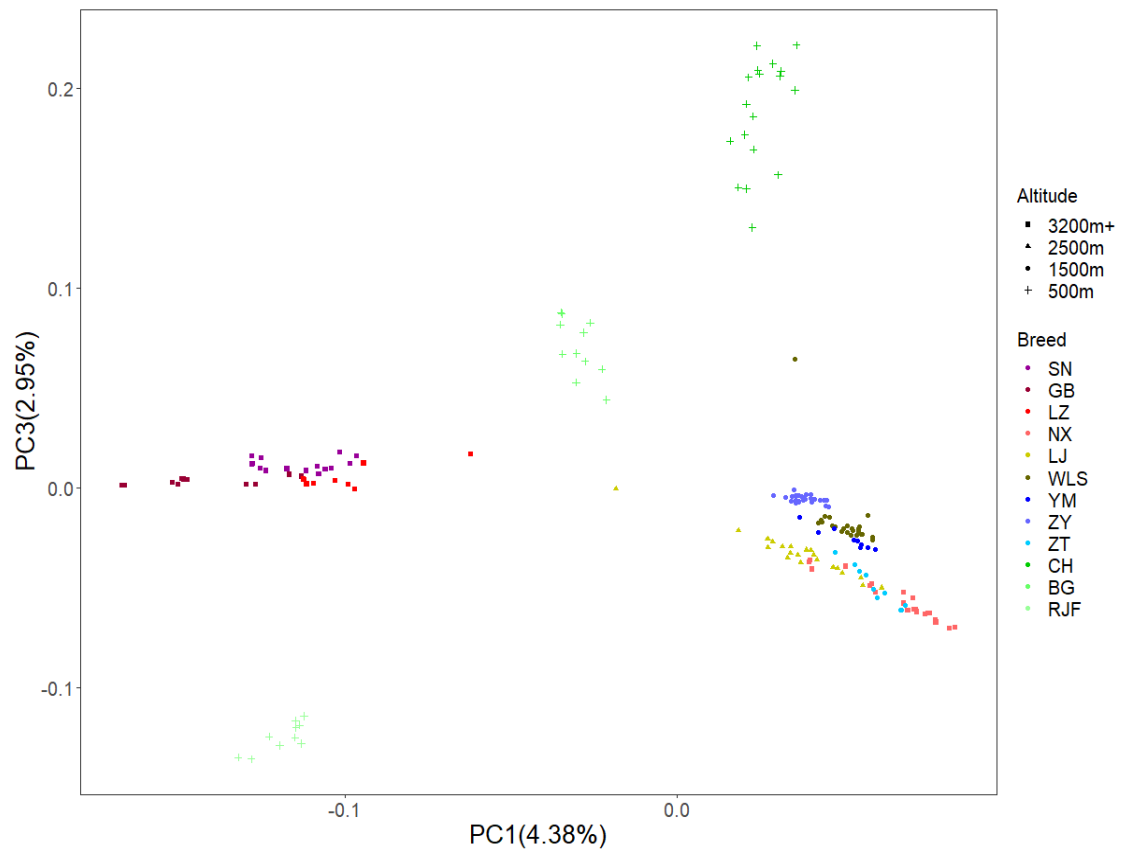

**Figure S6. Cross-validation error for ADMIXTURE analysis.**

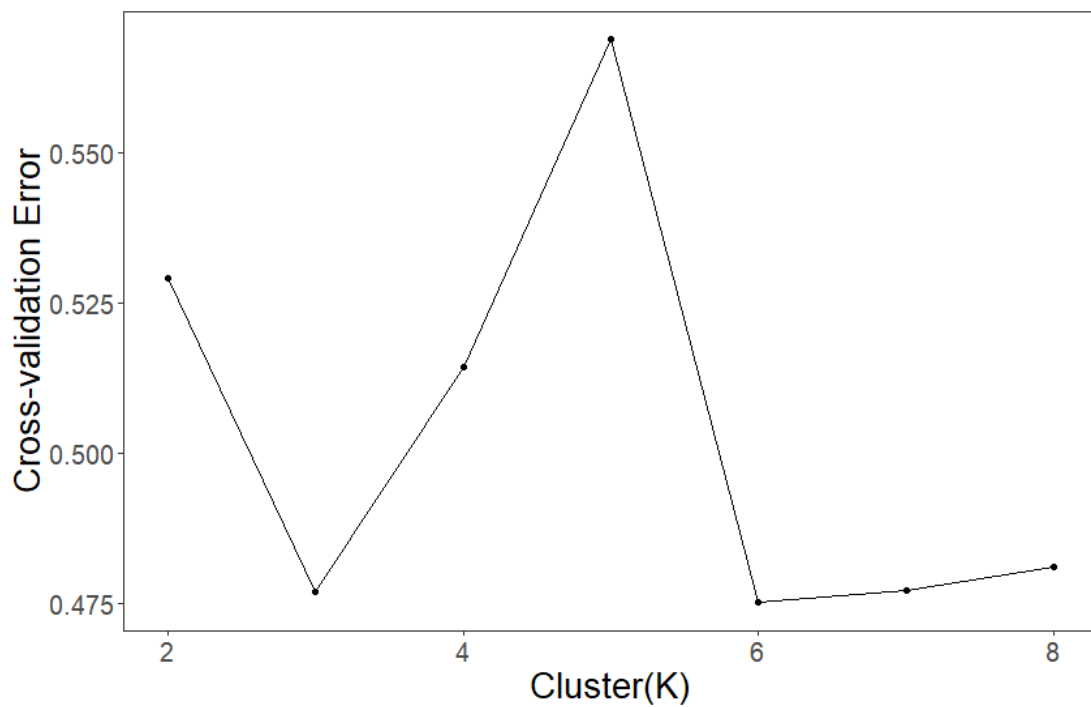

**Figure S7. Migration analysis of chicken breeds using TreeMix software.** (a) M=0-5 panels represent models of population affinities assuming 0-5 migration edges in TreeMix. The inferred migration weight is provided by the color of the arrow displayed. (b) Residual fit for models M=0-5.

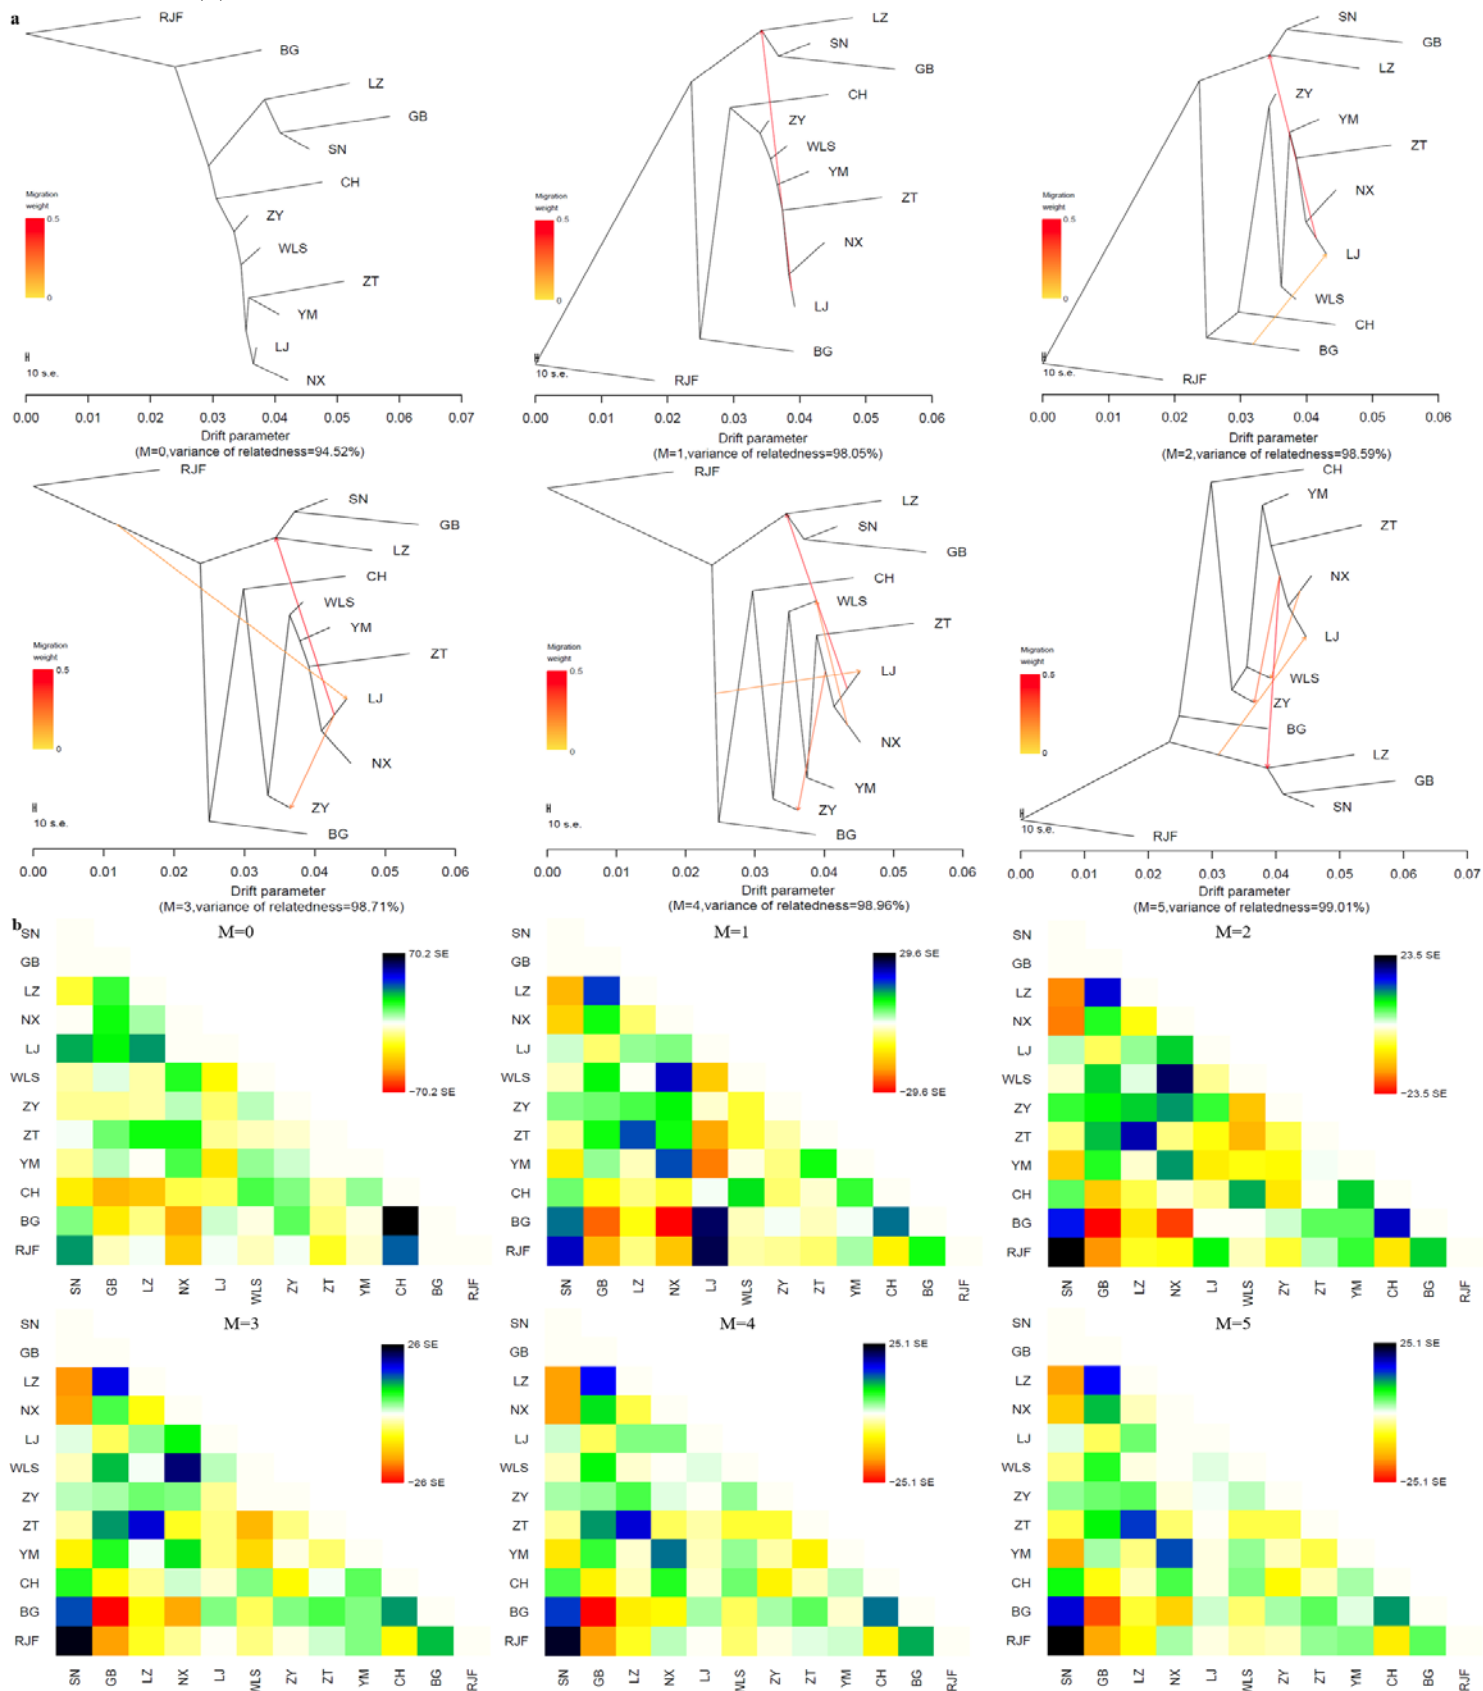

**Figure S8. Modeling the history of Tibetan chicken using the qpGraph program.** Best fit model inferred by qpGraph program for chicken populations from “1500 m”, “2500 m” and “3200 m+”; the “500 m” population was used as the outgroup. Branch lengths are shown in units of  $F_{ST} \times 1000$ . Dotted lines denote admixture events and values beside the dotted line correspond to admixture proportions.

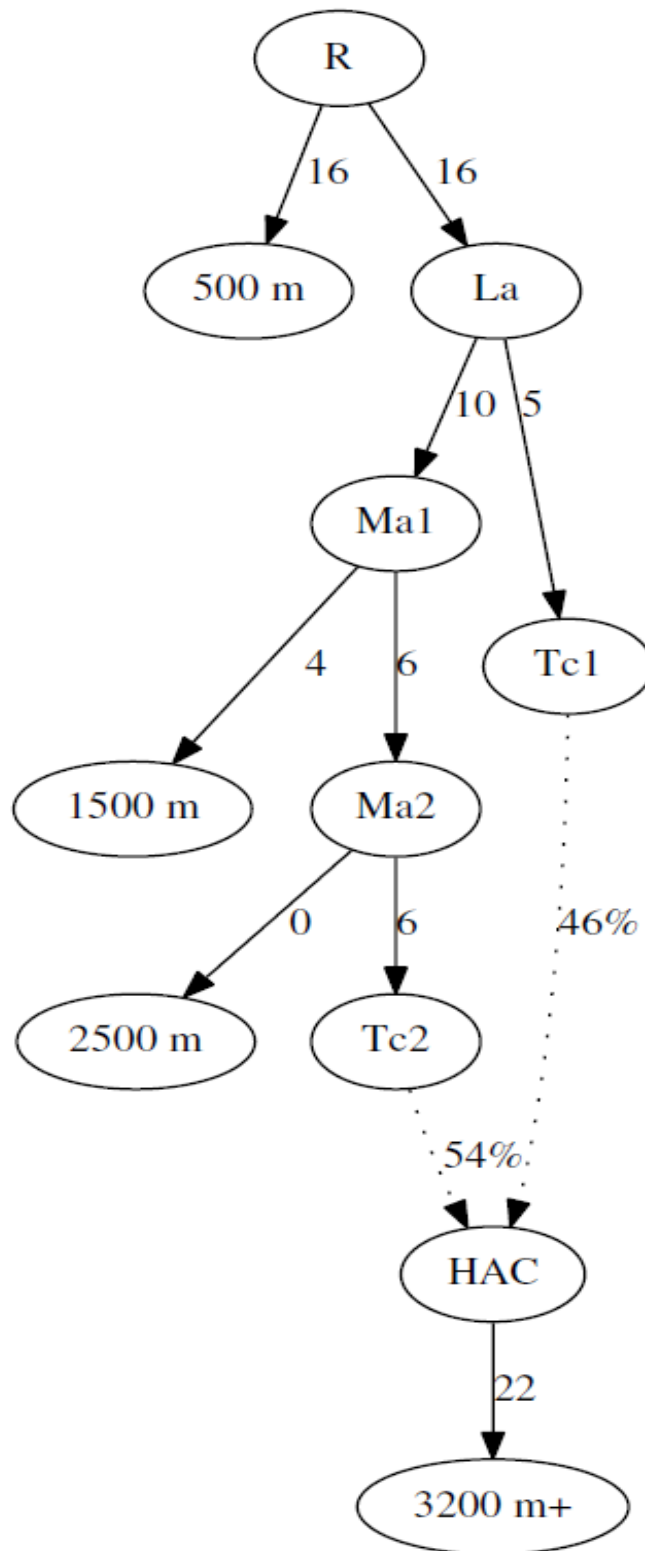

**Figure S9. Three-population test between TBC and other Chinese domestic chicken breeds.** Estimated  $f_3$  value  $\pm$  standard errors are plotted.

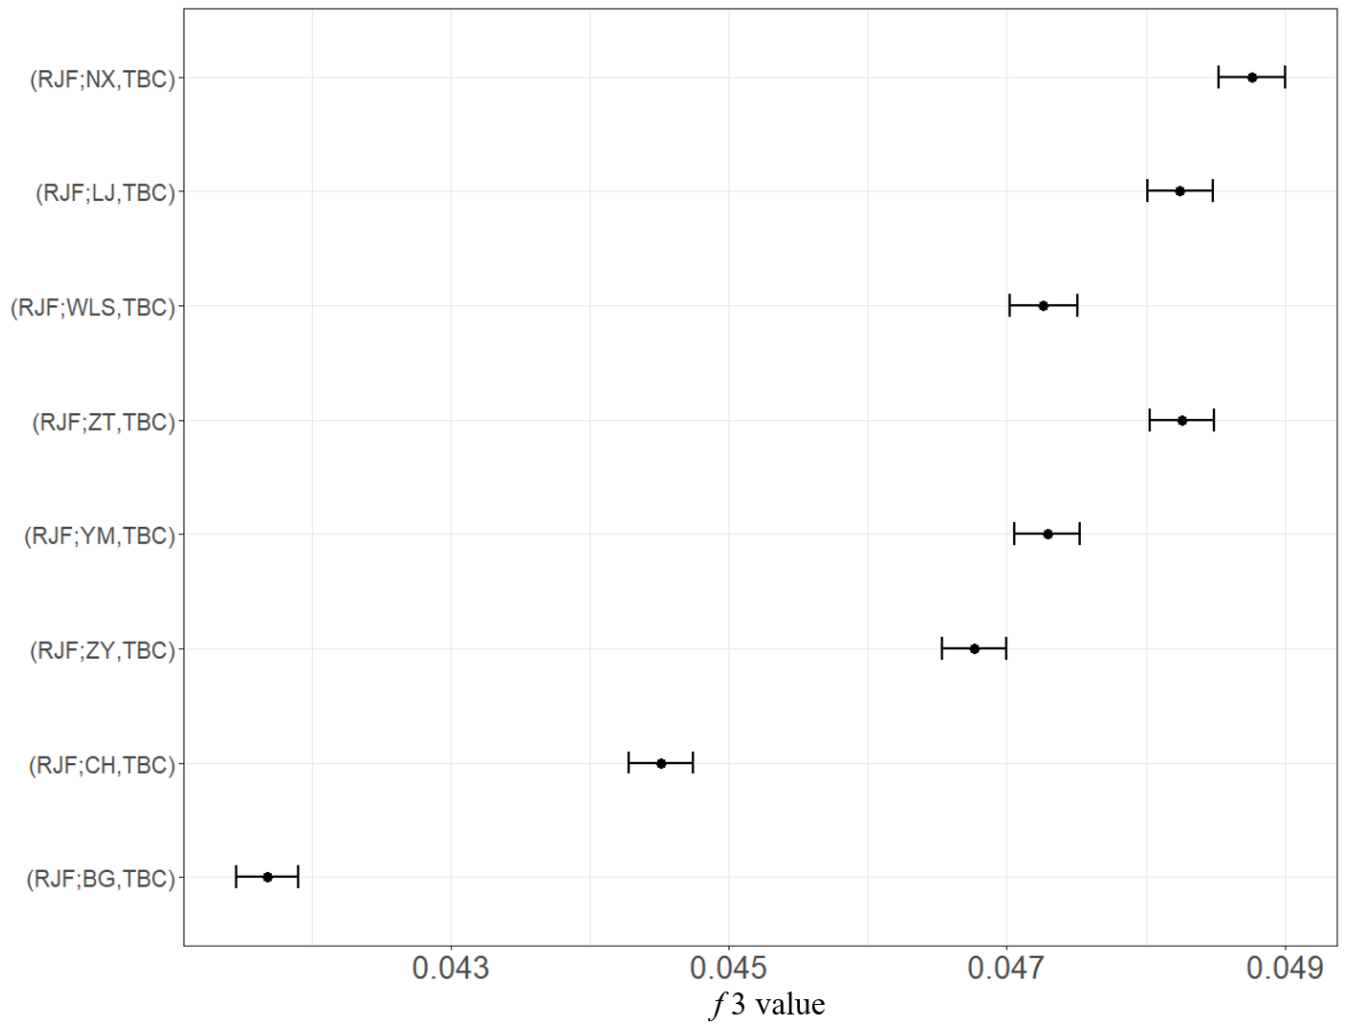



**Figure S10.** *D* statistics with form **D** (W, X; Y, Z) for TBC and NX. Estimated *D*-value  $\pm$  standard errors and *Z*-value are plotted.

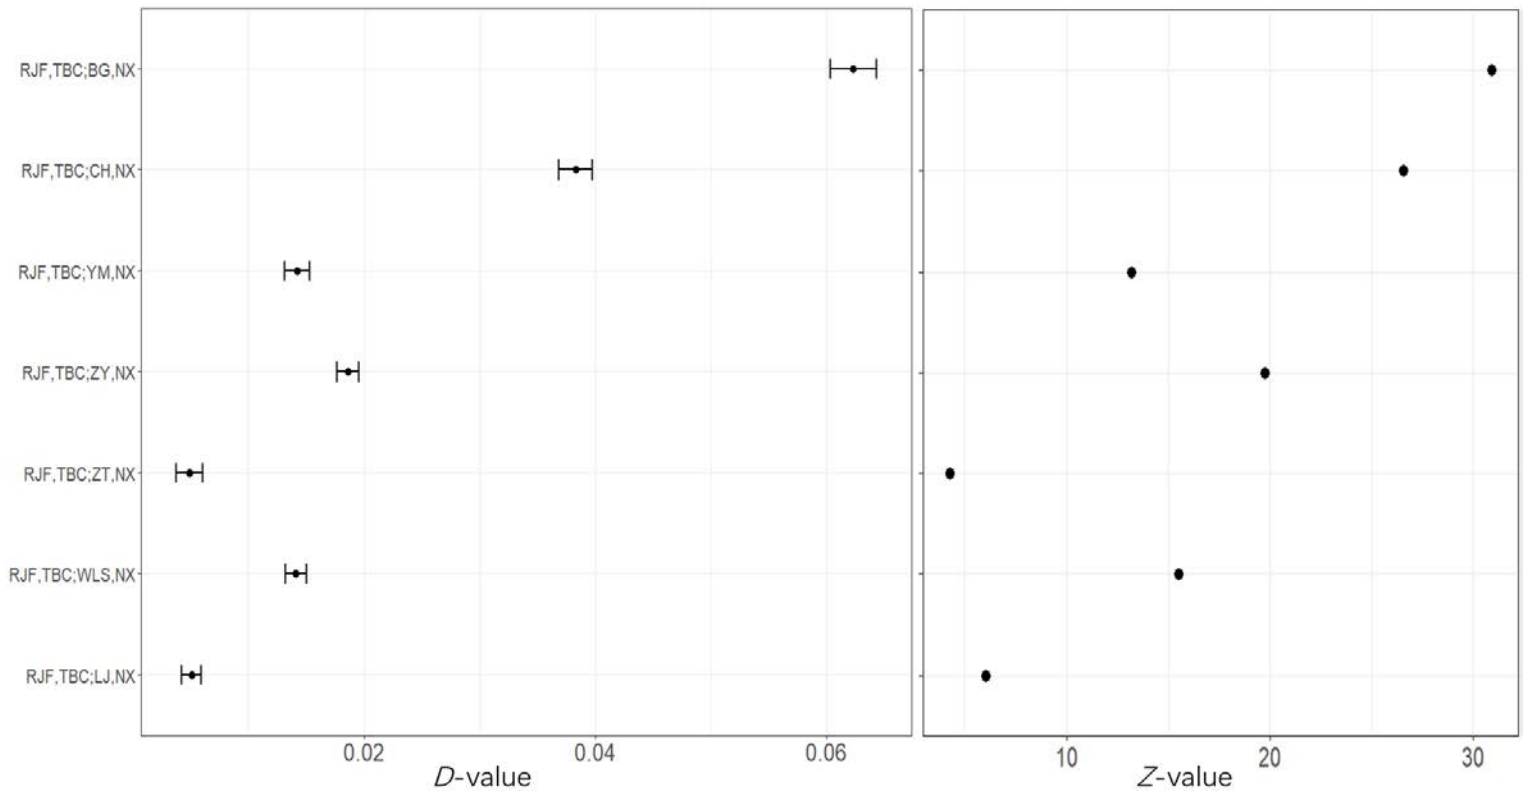

**Figure S11. SMC++ estimated effective population size of 12 chicken breeds.** Generation time and mutation rate for chicken were 1 year and  $1.91 \times 10^{-9}$  substitutions per site per year, respectively.

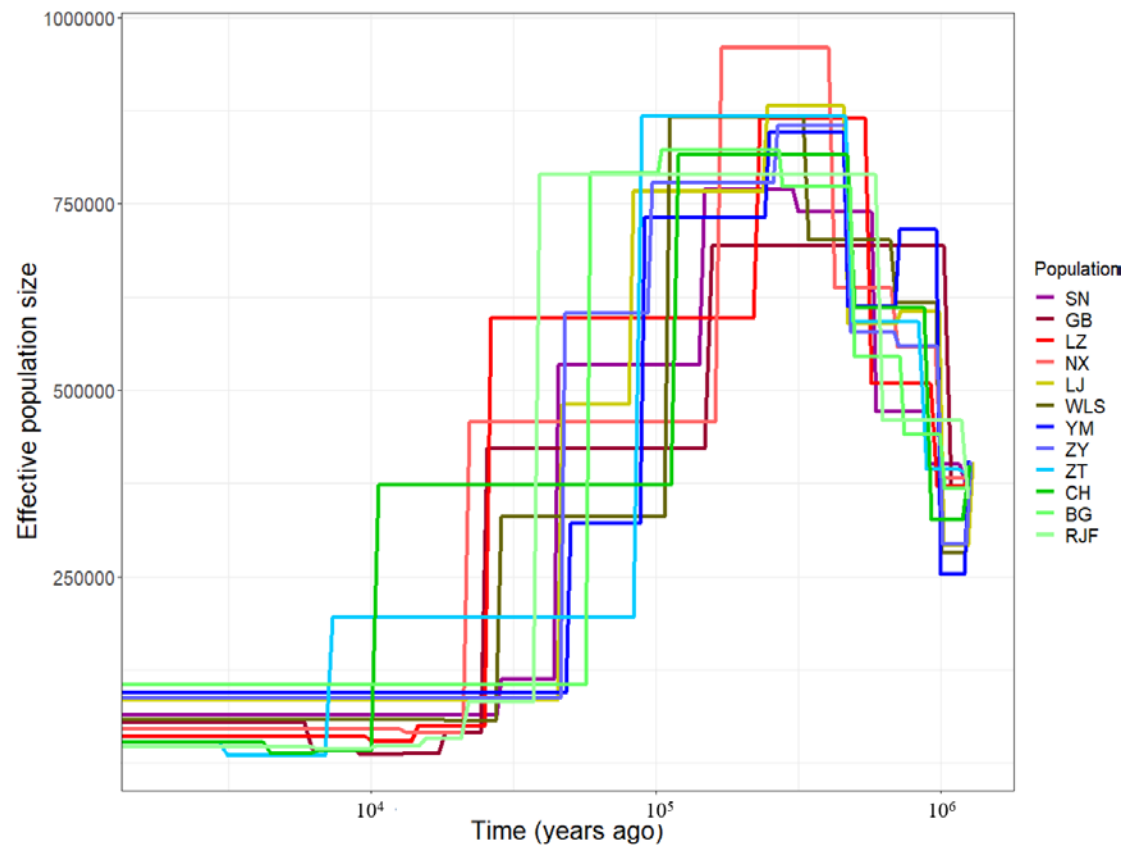

**Figure S12. Four alternative models for the demographic history of Tibetan chickens.**  $T_0$ , time when the ancestral Chinese domestic chicken evolved into 1500m altitude area, in years;  $T_m$ , time of admixture between populations, in years. In Model 1, Model 2, and Model 3,  $T_1$  represents the second split time of ancestral Chinese domestic chicken in years. In Model 1,  $T_2$  represents the splitting time of JR and TBC population in years. In Model 2,  $T_2$  represents the splitting time of the JR population in years. In Model 3,  $T_2$  represents the splitting time of the TBC population in years. In Model 4,  $T_1$  represents the splitting time of the JR population while  $T_2$  corresponds to the splitting time of the TBC population in years.

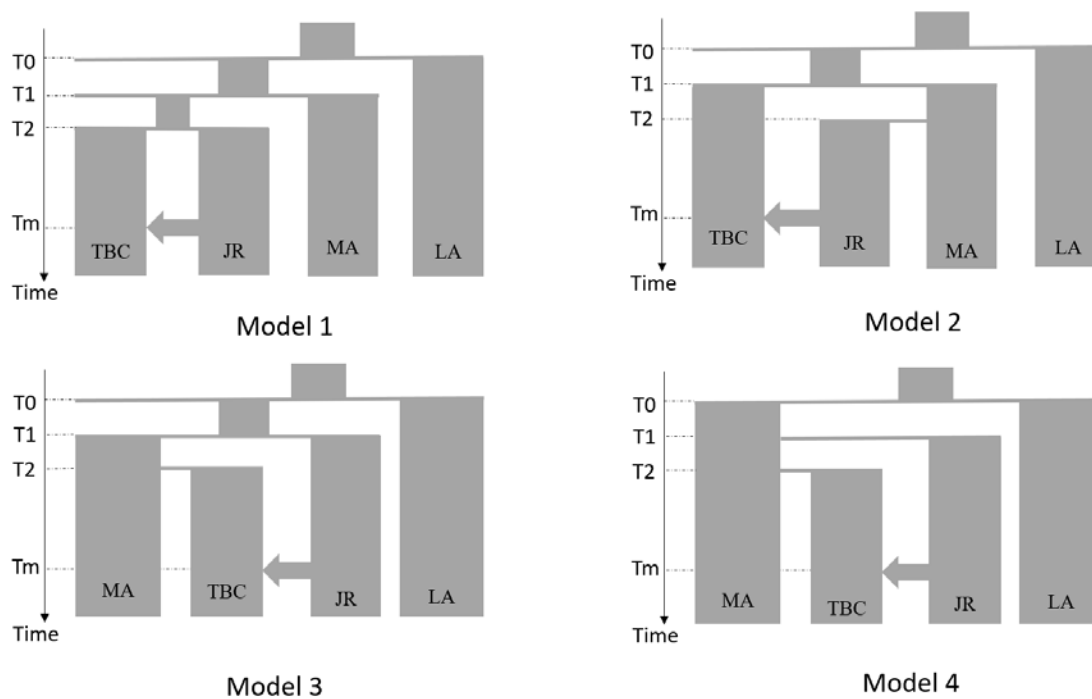

**Figure S13. Akaike information criterion (AIC) distribution generated under alternative models.** The “\*\*\*\*” presents  $p$ -value  $< 0.0001$ . AIC indicated that Model 2 was the best model.

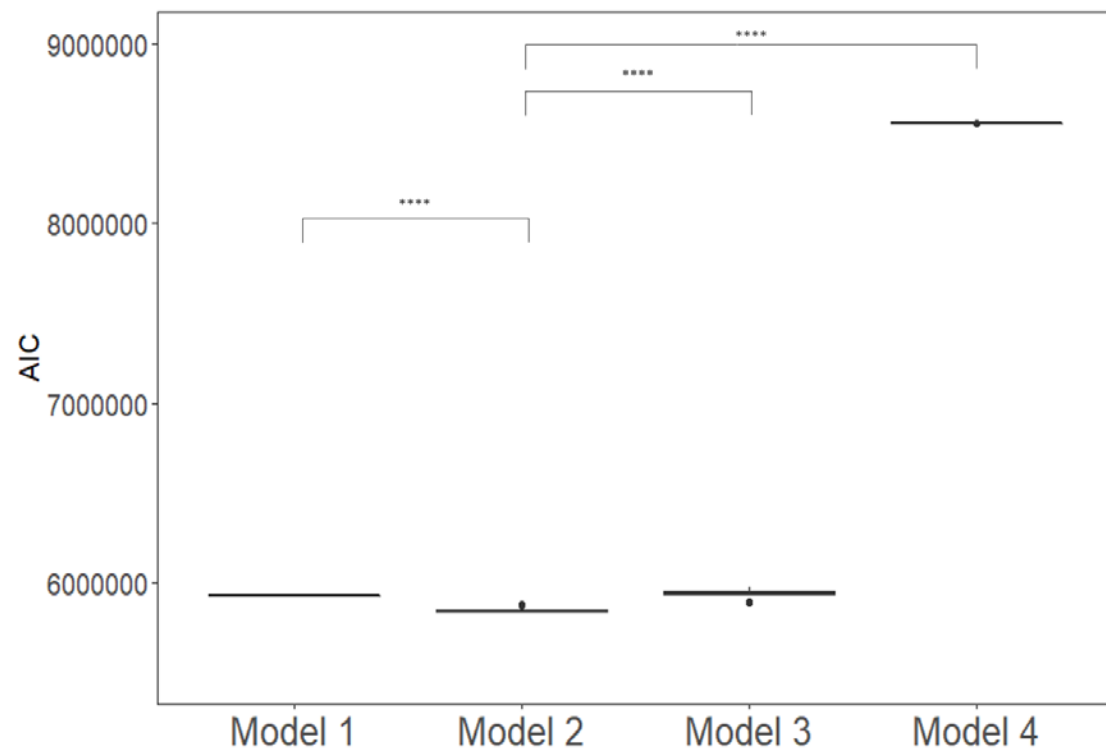

**Figure S14. Positive selection scans for high altitude adaptation between TBC and other altitude populations by win-Fst. (a) represents “1500m” and (b) for “2500m”. Red line, selection criteria for test value.**

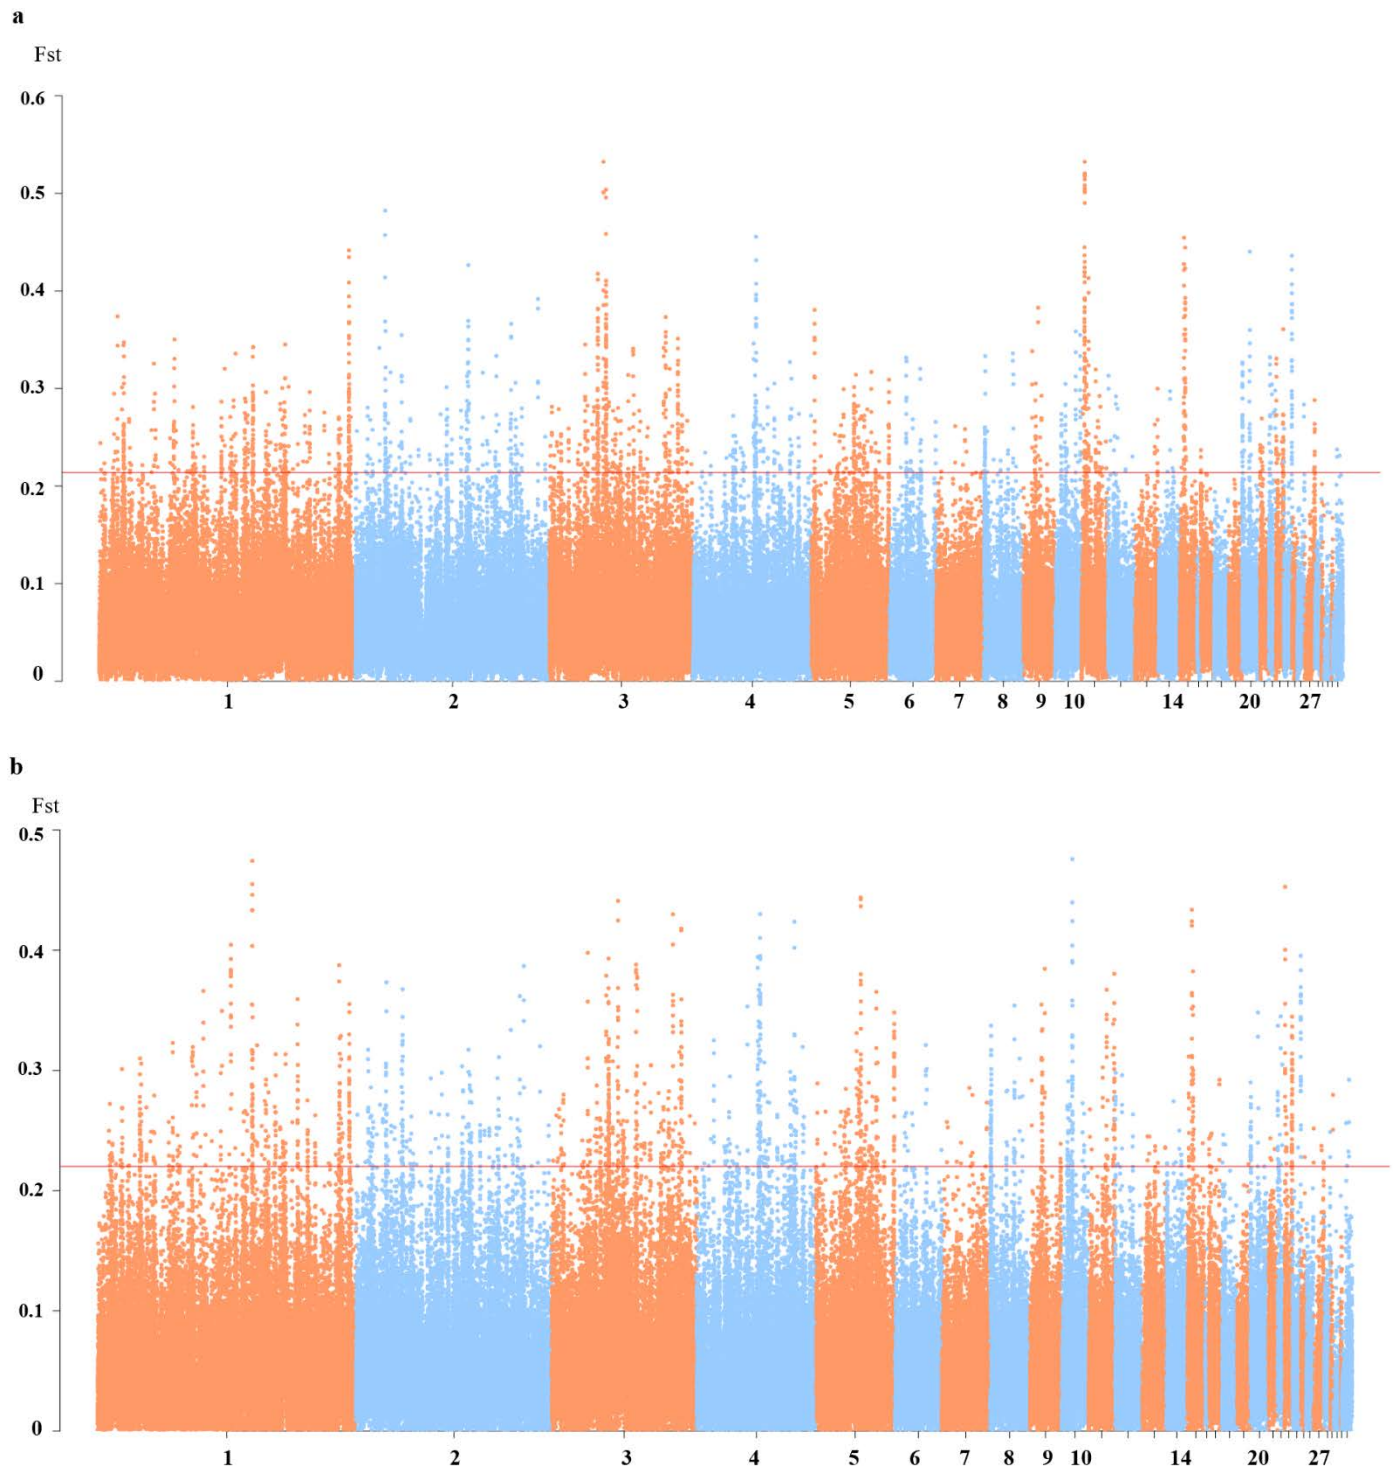

**Figure S15. Positive selection scans for high altitude adaptation in NX by win-Fst.** Red line, selection criteria for test value; black dots, strongly selected windows.

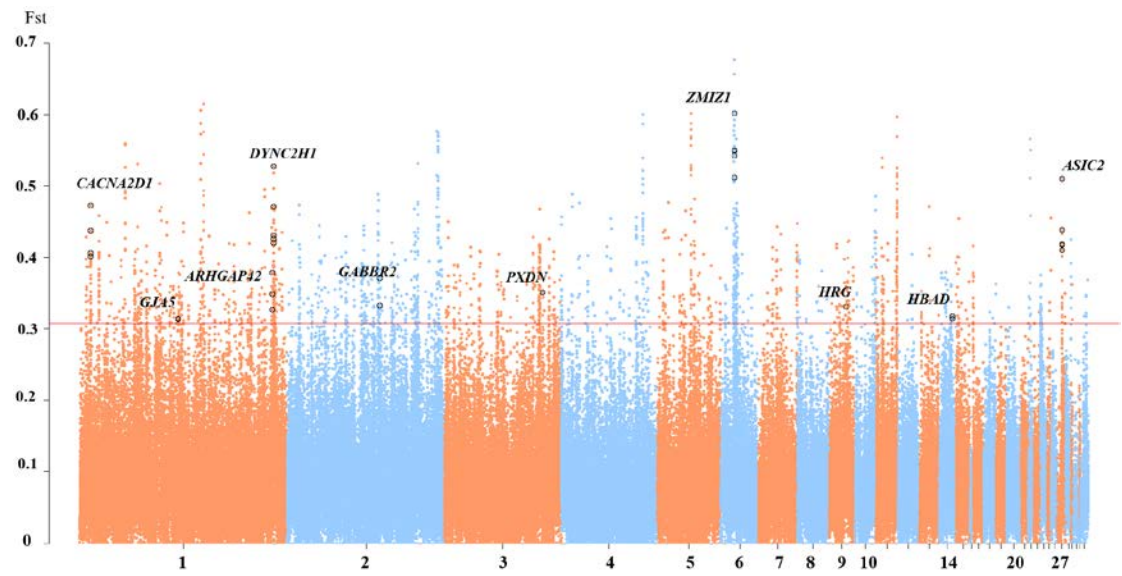

Supplement: EVA-15-2100-s001.pdf [file EVA-15-2100-s001.pdf]
